# Supplementary material for: A genomic landscape of mitochondrial DNA insertions in the pig nuclear genome provides evolutionary signatures of interspecies admixture
Source: PubMed Central journal article supplement — DNA Res. 2017 Apr 27;24(5):487–98. doi: 10.1093/dnares/dsx019 (PMC5737481; doi:10.1093/dnares/dsx019), 2017-04-27
Supplement: dsx019_supplementary_file_s3.pdf [file dsx019_supplementary_file_s3.pdf]

| Numt regions (merging contiguous numt sequences) | Numt sequence (progressive number) | SSC | Start (position) on SSC | Spanned region on the chromosome (size in bp) | End (position) on SSC | Spanned region on the mtDNA (size in bp) | mtDNA strand | Start position on mtDNA | End position on mtDNA | Identity (numt vs mtDNA) | RepeatMasker Annotations     | RepeatMasker annotation. 1 kb upstream | Upstream distance (numt integration to detected repeat) | RepeatMasker annotation. 1 kb downstream | Downstream distance (numt integration to detected repeat) | Closest ENSEMBL ID | Closest ENSEMBL ID distance in bp | Overlap of mtDNA gene in Sus scrofa | numt vs modern | ancestral vs modern | shared_diff_consens_us_witho_ut_pacari | Estimated age of integration (MYBP) | Coordinates on Bos taurus mtDNA | Coordinates of numt in Bos taurus | Overlap of mtDNA gene in Bos taurus |
|--------------------------------------------------|------------------------------------|-----|-------------------------|-----------------------------------------------|-----------------------|------------------------------------------|--------------|-------------------------|-----------------------|--------------------------|------------------------------|----------------------------------------|---------------------------------------------------------|------------------------------------------|-----------------------------------------------------------|--------------------|-----------------------------------|-------------------------------------|----------------|---------------------|----------------------------------------|-------------------------------------|---------------------------------|-----------------------------------|-------------------------------------|
| N_R_1                                            | 1_01                               | 1   | 54243463                | 163                                           | 54243676              | 159                                      | +            | 8613                    | 8772                  | 73                       | L2 LINE/L2                   | L2 LINE/L2                             | 70                                                      | L2 LINE/L2                               | 436                                                       | ENSSSCG0638306     | 638306                            | COX2                                | 2              | 6                   | 0.333333                               | 6.666667                            | MT-14192-15280                  | 9-12026093-12927104               |                                     |
| N_R_1                                            | 1_02                               | 1   | 59428889                | 375                                           | 59429264              | 375                                      | -            | 12074                   | 12448                 | 71                       | PreD_SS_SINE/RNA             | unique upstream                        | -                                                       | PreD_SS_SINE/RNA                         | 93                                                        | ENSSSCG014903      | 14903                             | ND4                                 | 0              | 4                   | 0                                      | 10                                  | MT-14192-15280                  | 9-12026093-12927104               | ND6, cytb                           |
| N_R_1                                            | 1_03                               | 1   | 59430000                | 1297                                          | 59431365              | 13020                                    | -            | 10333                   | 11652                 | 68                       | LIB_SS_LINE/L1               | PreD_SS_SINE/RNA                       | 42                                                      | L1ME3F-LINE/L1                           | 20                                                        | ENSSSCG017004      | 17004                             | COX3                                | 7              | 23                  | 0.304348                               | 6.956522                            | MT-14192-15280                  | 9-12026093-12927104               | ND6, cytb                           |
| N_R_1                                            | 1_04                               | 1   | 59432563                | 242                                           | 59432805              | 243                                      | -            | 9909                    | 10151                 | 72                       | PRE1j_SINE/RNA               | PreD_SS_SINE/RNA                       | 13                                                      | PRE1j_SINE/RNA                           | 8                                                         | ENSSSCG018444      | 18444                             | COX3                                | 1              | 2                   | 0.5                                    | 5                                   | MT-14192-15280                  | 9-12026093-12927104               | ND6, cytb                           |
| N_R_1                                            | 1_05                               | 1   | 59433560                | 245                                           | 59433560              | 245                                      | -            | 9661                    | 9905                  | 73                       | (A)nSimple repeat            | (A)nSimple repeat                      | 17                                                      | PRE1j_SINE/RNA                           | 14                                                        | ENSSSCG019199      | 19199                             | ATP6                                | 3              | 7                   | 0.428571                               | 5.714286                            | MT-14192-15280                  | 9-12026093-12927104               | ND6, cytb                           |
| N_R_1                                            | 1_06                               | 1   | 59433830                | 319                                           | 59434149              | 317                                      | -            | 9348                    | 9664                  | 65                       | PreD_SS_SINE/RNA             | PreD_SS_SINE/RNA                       | 7                                                       | PreD_SS_SINE/RNA                         | 7                                                         | ENSSSCG019788      | 19788                             | ATP6                                | 2              | 5                   | 0.4                                    | 6                                   | MT-14192-15280                  | 9-12026093-12927104               | ND6, cytb                           |
| N_R_1                                            | 1_07                               | 1   | 59436418                | 148                                           | 59436366              | 154                                      | -            | 6953                    | 7108                  | 69                       | PreD_SS_SINE/RNA             | PreD_SS_SINE/RNA                       | 30                                                      | PRE1k_SINE/RNA                           | 20                                                        | ENSSSCG022205      | 22205                             | COX1                                | 0              | 1                   | 0                                      | 10                                  | MT-14192-15280                  | 9-12026093-12927104               | ND6, cytb                           |
| N_R_1                                            | 1_08                               | 1   | 59436708                | 410                                           | 59437118              | 414                                      | -            | 5904                    | 6317                  | 71                       | non-repetitive               | non-repetitive                         | 320                                                     | PRE1k_SINE/RNA                           | 238                                                       | ENSSSCG022757      | 22757                             | ND2                                 | 3              | 10                  | 0.3                                    | 7                                   |                                 |                                   |                                     |
| N_R_1                                            | 1_09                               | 1   | 64789172                | 94                                            | 64789266              | 98                                       | -            | 3196                    | 3293                  | 80                       | Interrupting_(TTCT)n_Simple  | Interrupting_(TTCT)n_Simple            | 85                                                      | (TTCT)n_Simple_repeat                    | 3                                                         | ENSSSCG02624       | 2624                              | 0                                   | 0              | 0                   | 0                                      |                                     |                                 |                                   |                                     |
| N_R_2                                            | 1_10                               | 1   | 82987621                | 560                                           | 82988181              | 573                                      | -            | 1164                    | 1736                  | 70                       | PRE1f_SINE/RNA               | PRE1f_SINE/RNA                         | 16                                                      | (TATTT)Gin_Simple_repeat                 | 114                                                       | ENSSSCG049978      | 49978                             | 1                                   | 3              | 0.333333            | 6.666667                               |                                     |                                 |                                   |                                     |
| N_R_2                                            | 1_11                               | 1   | 82988609                | 319                                           | 82989288              | 327                                      | -            | 371                     | 697                   | 75                       | non-repetitive               | (TATTT)Gin_Simple_repeat               | 273                                                     | (A)nSimple_repeat                        | 667                                                       | ENSSSCG050725      | 50725                             | 0                                   | 0              | 0                   | 0                                      |                                     |                                 |                                   |                                     |
| N_R_3                                            | 1_12                               | 1   | 83019297                | 288                                           | 83019385              | 295                                      | +            | 4656                    | 4941                  | 72                       | PreD_SS_SINE/RNA             | L1-3_Sc:LINE/L1                        | 505                                                     | PreD_SS_SINE/RNA                         | 34                                                        | ENSSSCG081882      | 81882                             | ND1                                 | 2              | 5                   | 0.4                                    | 6                                   |                                 |                                   |                                     |
| N_R_3                                            | 1_13                               | 1   | 83020373                | 496                                           | 83020869              | 506                                      | +            | 5235                    | 5741                  | 67                       | PreD_SS_SINE/RNA             | PRE1f_SINE/RNA                         | 224                                                     | PreD_SS_SINE/RNA                         | 67                                                        | ENSSSCG082666      | 82666                             | ND2                                 | 2              | 6                   | 0.333333                               | 6.666667                            |                                 |                                   |                                     |
| N_R_3                                            | 1_14                               | 1   | 83021270                | 2113                                          | 83023383              | 2198                                     | +            | 5838                    | 8036                  | 67                       | PRE1e_SINE/RNA               | PreD_SS_SINE/RNA                       | 102                                                     | (AAAC)n_Simple_repeat                    | 1                                                         | ENSSSCG085180      | 85180                             | ND2                                 | 9              | 45                  | 0.2                                    | 8                                   |                                 |                                   |                                     |
| N_R_3                                            | 1_15                               | 1   | 83023728                | 206                                           | 83023934              | 196                                      | +            | 8066                    | 8262                  | 71                       | CHR1_SINE/RNA                | (AATAA)n_Simple_repeat                 | 29                                                      | CHR1_SINE/RNA                            | 14                                                        | ENSSSCG085437      | 85437                             | 1                                   | 3              | 0.333333            | 6.666667                               |                                     |                                 |                                   |                                     |
| N_R_3                                            | 1_16                               | 1   | 83024140                | 372                                           | 83024512              | 390                                      | +            | 8379                    | 8769                  | 69                       | CHR1_SINE/RNA                | CHR1_SINE/RNA                          | 84                                                      | SINE1a_SS_SINE/RNA                       | 597                                                       | ENSSSCG085025      | 85025                             | COX2                                | 0              | 10                  | 0                                      | 10                                  |                                 |                                   |                                     |
| N_R_4                                            | 1_17                               | 1   | 92609642                | 577                                           | 92609518              | 581                                      | -            | 1644                    | 2235                  | 74                       | SINE1c_SS_SINE/RNA           | SINE1c_SS_SINE/RNA                     | 10                                                      | L1-3_Sc:LINE/L1                          | 168                                                       | SINE1c_SS_SINE/RNA | 14                                | 0                                   | 3              | 0                   | 10                                     |                                     |                                 |                                   |                                     |
| N_R_4                                            | 1_18                               | 1   | 92608786                | 536                                           | 92609322              | 560                                      | +            | 2679                    | 3239                  | 70                       | Interrupting_SINE1B_SS_SINE  | SINE1B_SS_SINE/RNA                     | 4                                                       | SINE1B_SS_SINE/RNA                       | 1                                                         | ENSSSCG032666      | 32666                             | 2                                   | 4              | 0.5                 | 5                                      |                                     |                                 |                                   |                                     |
| N_R_4                                            | 1_19                               | 1   | 92609695                | 696                                           | 92610391              | 713                                      | +            | 3242                    | 3955                  | 71                       | Interrupting_HAL1_SS_LINE/L1 | PreD_SS_SINE/RNA                       | 8                                                       | HAL1_SS_LINE/L1                          | 11                                                        | ENSSSCG031757      | 31757                             | 2                                   | 4              | 0.5                 | 5                                      |                                     |                                 |                                   |                                     |
| N_R_5                                            | 1_20                               | 1   | 92635351                | 696                                           | 92636047              | 713                                      | -            | 3243                    | 3955                  | 71                       | Interrupting_HAL1_SS_LINE/L1 | HAL1_SS_LINE/L1                        | 9                                                       | PreD_SS_SINE/RNA                         | 10                                                        | ENSSSCG06101       | 6101                              | 2                                   | 4              | 0.5                 | 5                                      |                                     |                                 |                                   |                                     |
| N_R_5                                            | 1_21                               | 1   | 92636420                | 536                                           | 92636956              | 560                                      | -            | 2680                    | 3239                  | 70                       | Interrupting_SINE1B_SS_SINE  | SINE1B_SS_SINE/RNA                     | 0                                                       | SINE1D_SS_SINE/RNA                       | 6                                                         | ENSSSCG05032       | 5032                              | 2                                   | 4              | 0.5                 | 5                                      |                                     |                                 |                                   |                                     |
| N_R_5                                            | 1_22                               | 1   | 92638204                | 596                                           | 92638800              | 600                                      | +            | 1645                    | 2244                  | 73                       | SINE1c_SS_SINE/RNA           | L1B_SS_LINE/L1                         | 147                                                     | SINE1c_SS_SINE/RNA                       | 12                                                        | ENSSSCG034948      | 34948                             | 0                                   | 3              | 0                   | 10                                     |                                     |                                 |                                   |                                     |
| N_R_5                                            | 1_23                               | 1   | 100519015               | 188                                           | 100519203             | 188                                      | -            | 4837                    | 5024                  | 98                       | non-repetitive               | L1-3_Sc:LINE/L1                        | 0                                                       | L1-3_Sc:LINE/L1                          | 0                                                         | 0                  | 0                                 | 1                                   | 1              | 0                   | 0                                      |                                     |                                 |                                   |                                     |
| N_R_6                                            | 1_24                               | 1   | 102221644               | 109                                           | 102221753             | 109                                      | +            | 10431                   | 10540                 | 87                       | Interrupting_MER31_BT_LTR    | MER31_BT_LTR/ERV1                      | 4                                                       | MER31_BT_LTR/ERV1                        | 4                                                         | ENSSSCG033168      | 33168                             | COX3                                | 0              | 0                   | 0                                      | 0                                   |                                 |                                   |                                     |
| N_R_6                                            | 1_25                               | 1   | 124625979               | 403                                           | 124626382             | 407                                      | -            | 15201                   | 15607                 | 76                       | Interrupting_MIRb_SINE/MIR   | MIRb_SINE/MIR                          | 68                                                      | PreD_SS_SINE/RNA                         | 525                                                       | ENSSSCG073882      | 73882                             | ND2                                 | 6              | 7                   | 0.285714                               | 7.142857                            | MT-14438-14796                  | 10-51465520-51465880              | ND6, cytb                           |
| N_R_6                                            | 1_26                               | 1   | 164215124               | 84                                            | 164215208             | 84                                       | +            | 13014                   | 13098                 | 88                       | non-repetitive               | L1B_SS_LINE/L1                         | 124                                                     | Tigger15a_DNA/TcMar-Tigger               | 302                                                       | ENSSSCG0262081     | 262081                            | ND5                                 | 0              | 2                   | 0                                      | 10                                  |                                 |                                   |                                     |
| N_R_6                                            | 1_27                               | 1   | 167870740               | 69                                            | 167870809             | 69                                       | -            | 7694                    | 7762                  | 88                       | Interrupting_L2 LINE/L2      | L2 LINE/L2                             | 165                                                     | L2 LINE/L2                               | 165                                                       | ENSSSCG0161687     | 161687                            | COX1                                | 0              | 0                   | 0                                      | 0                                   |                                 |                                   |                                     |
| N_R_6                                            | 1_28                               | 1   | 176025925               | 52                                            | 176025977             | 52                                       | -            | 812                     | 863                   | 90                       | Interrupting_L3_Sc:LINE/L1   | LTR33B/LTR/ERV1                        | 282                                                     | Interrupting_L3_Sc:LINE/L1               | 271                                                       | ENSSSCG022681      | 22681                             | 0                                   | 0              | 0                   | 0                                      |                                     |                                 |                                   |                                     |
| N_R_6                                            | 1_29                               | 1   | 176025940               | 306                                           | 176026246             | 304                                      | -            | 445                     | 748                   | 85                       | PRE1e_SINE/RNA               | LTR33B/LTR/ERV1                        | 299                                                     | PRE1e_SINE/RNA                           | 22                                                        | ENSSSCG022737      | 22737                             | 0                                   | 0              | 0                   | 0                                      |                                     |                                 |                                   |                                     |
| N_R_6                                            | 1_30                               | 1   | 245767085               | 165                                           | 245767250             | 165                                      | +            | 9980                    | 10145                 | 87                       | Interrupting_LTR33A_LTR/ERV1 | LTR33A_LTR/ERV1                        | 45                                                      | ENSSSCG010052                            | 10052                                                     | COX3               | 0                                 | 1                                   | 0              | 10                  |                                        |                                     |                                 |                                   |                                     |
| N_R_6                                            | 1_31                               | 1   | 248065328               | 159                                           | 248065328             | 158                                      | -            | 12812                   | 12969                 | 75                       | L1MC5_LINE/L1                | (A)nSimple_repeat                      | 124                                                     | L1MC5_LINE/L1                            | 7                                                         | ENSSSCG00          | 0                                 | 0                                   | 1              | 0                   | 10                                     |                                     |                                 |                                   |                                     |
| N_R_6                                            | 1_32                               | 1   | 267571512               | 57                                            | 267571569             | 57                                       | +            | 969                     | 966                   | 86                       | SINE1_SS_SINE/RNA            | SINE1_SS_SINE/RNA                      | 103                                                     | SINE1_SS_SINE/RNA                        | 148                                                       | ENSSSCG00          | 0                                 | 0                                   | 1              | 0                   | 10                                     |                                     |                                 |                                   |                                     |
| N_R_6                                            | 1_33                               | 1   | 280940801               | 79                                            | 280940880             | 79                                       | +            | 4465                    | 4543                  | 89                       | PRE1f_SINE/RNA               | MIRb_SINE/MIR                          | 237                                                     | PRE1f_SINE/RNA                           | 195                                                       | ENSSSCG00          | 0                                 | ND1                                 | 0              | 0                   | 0                                      | 0                                   |                                 |                                   |                                     |
| N_R_6                                            | 1_34                               | 1   | 281080959               | 79                                            | 281081038             | 79                                       | +            | 4465                    | 4543                  | 89                       | PreD_SS_SINE/RNA             | PreD_SS_SINE/RNA                       | 91                                                      | MIRb_SINE/MIR                            | 195                                                       | ENSSSCG00          | 0                                 | ND1                                 | 0              | 0                   | 0                                      | 0                                   |                                 |                                   |                                     |
| N_R_6                                            | 1_35                               | 1   | 309277579               | 131                                           | 309277710             | 131                                      | +            | 2326                    | 2457                  | 89                       | L1-2_Sc:LINE/L1              | PreD_SS_SINE/RNA                       | 42                                                      | L1-2_Sc:LINE/L1                          | 26                                                        | ENSSSCG0198719     | 198719                            | 1                                   | 10             | 0.1                 | 9                                      |                                     |                                 |                                   |                                     |
| N_R_6                                            | 1_36                               | 1   | 310455996               | 332                                           | 310456328             | 335                                      | +            | 10373                   | 10708                 | 67                       | L1-3_Sc:LINE/L1              | L1-3_Sc:LINE/L1                        | 78                                                      | PRE1h_SINE/RNA                           | 135                                                       | ENSSSCG0128133     | 128133                            | COX3                                | 0              | 4                   | 0                                      | 10                                  |                                 |                                   |                                     |
| N_R_6                                            | 1_37                               | 1   | 310490399               | 802                                           | 310491197             | 836                                      | +            | 10816                   | 11652                 | 64                       | PreD_SS_SINE/RNA             | PreD_SS_SINE/RNA                       | 7                                                       | PRE1h_SINE/RNA                           | 399                                                       | ENSSSCG0183002     | 183002                            | ND3                                 | 7              | 17                  | 0.411765                               | 5.882353                            |                                 |                                   |                                     |
| N_R_7                                            | 2_01                               | 2   | 21108238                | 443                                           | 21108881              | 442                                      | -            | 152                     | 593                   | 89                       | L1MC4c_LINE/L1               | L1MC4c_LINE/L1                         | 153                                                     | L1MC4c_LINE/L1                           | 570                                                       | ENSSSCG0409972     | 409972                            | 0                                   | 0              | 0                   | 0                                      |                                     |                                 |                                   |                                     |
| N_R_7                                            | 2_02                               | 2   | 21108896                | 347                                           | 21109243              | 347                                      | -            | 16242                   | 16588                 | 87                       | Interrupting_L1MS_LINE/L1    | (ATGTAAT)n_Simple_repeat               | 259                                                     | L1MS_LINE/L1                             | 8                                                         | ENSSSCG0410534     | 410534                            | CYTB                                | 1              | 7                   | 0.142857                               | 8.571429                            |                                 |                                   |                                     |
| N_R_7                                            | 2_03                               | 2   | 25870647                | 697                                           | 25871344              | 713                                      | -            | 3170                    | 3882                  | 64                       | L2a_LINE/L2                  | MER58B_DNA/AT-Charlie                  | 113                                                     | L2a_LINE/L2                              | 21                                                        | ENSSSCG0841425     | 841425                            | 2                                   | 3              | 0.666667            | 3.333333                               |                                     |                                 |                                   |                                     |
| N_R_7                                            | 2_04                               | 2   | 49971920                | 56                                            | 49971976              | 56                                       | -            | 2655                    | 2710                  | 100                      | L1PB4_LINE/L1                | (A)nSimple_repeat                      | 592                                                     | L1PB4_LINE/L1                            | 18                                                        | ENSSSCG00          | 0                                 | 1                                   | 1              | 0                   | 10                                     |                                     |                                 |                                   |                                     |
| N_R_8                                            | 2_05                               | 2   | 56654753                | 382                                           | 56655195              | 377                                      | +            | 16211                   | 16588                 | 72                       | L1MC_LINE/L1                 | L1MC_LINE/L1                           | 138                                                     | L1MC_LINE/L1                             | 585                                                       | ENSSSCG016862      | 16862                             | CYTB                                | 1              | 7                   | 0.142857                               | 8.571429                            |                                 |                                   |                                     |
| N_R_8                                            | 2_06                               | 2   | 56653395                | 332                                           | 56653718              | 343                                      | +            | 174                     | 517                   | 172                      | L1MC_LINE/L1                 | L1MC_LINE/L1                           | 680                                                     | L1MC_LINE/L1                             | 17                                                        | ENSSSCG017465      | 17465                             | 0                                   | 0              | 0                   | 0                                      |                                     |                                 |                                   |                                     |
| N_R_9                                            | 2_07                               | 2   | 56752734                | 382                                           | 56753116              | 377                                      | +            | 16211                   | 16588                 | 72                       | L1MC_LINE/L1                 | L1MC_LINE/L1                           | 38                                                      | L1MC_LINE/L1                             | 585                                                       | ENSSSCG033170      | 33170                             | CYTB                                | 1              | 7                   | 0.142857                               | 8.571429                            |                                 |                                   |                                     |
| N_R_9                                            | 2_08                               | 2   | 56753376                | 323                                           | 56753699              | 343                                      | +            | 174                     | 517                   | 172                      | L1MC_LINE/L1                 | L1MC_LINE/L1                           | 680                                                     | L1MC_LINE/L1                             | 2                                                         | ENSSSCG033812      | 33812                             | 0                                   | 0              | 0                   | 0                                      |                                     |                                 |                                   |                                     |
| N_R_9                                            | 2_09                               | 2   | 67739690                | 72                                            | 67739762              | 72                                       | -            | 6087                    | 6158                  | 93                       | Interrupting_HAL1_SS_LINE/L1 | PreD_SS_SINE/RNA                       | 151                                                     | L1B_SS_SINE/L1                           | 180                                                       | ENSSSCG012031      | 12031                             | ND2                                 | 1              | 3                   | 0.333333                               | 6.666667                            |                                 |                                   |                                     |
| N_R_10                                           | 2_10                               | 2   | 67818443                | 72                                            | 67818515              | 72                                       | -            | 6086                    | 6158                  | 93                       | Interrupting_HAL1_SS_LINE/L1 | L1B_SS_SINE/L1                         | 178                                                     | PreD_SS_SINE/RNA                         | 153                                                       | ENSSSCG03585       | 3585                              | ND2                                 | 1              | 3                   | 0.333333                               | 6.666667                            |                                 |                                   |                                     |
| N_R_10                                           | 2_11                               | 2   | 83957047                | 121                                           | 83957168              | 121</                                    |              |                         |                       |                          |                              |                                        |                                                         |                                          |                                                           |                    |                                   |                                     |                |                     |                                        |                                     |                                 |                                   |                                     |



|    |    |    |           |          |           |          |      |       |       |      |                                              |                             |                        |                             |                      |          |          |        |          |          |          |          |          |          |          |  |  |
|----|----|----|-----------|----------|-----------|----------|------|-------|-------|------|----------------------------------------------|-----------------------------|------------------------|-----------------------------|----------------------|----------|----------|--------|----------|----------|----------|----------|----------|----------|----------|--|--|
| 9  | 15 | 9  | 74576183  | 62       | 74576245  | 62       | -    | 9688  | 9749  | 82   | Interrupting_L1-3_Ssc_LINE/L1-3_Ssc_LINE/HAT | 0                           | L1B_SS_LINE/L1         | 3                           | ENSSSCG0             | 1629     | ATP6     | 1      | 3        | 0.333333 | 6,666667 |          |          |          |          |  |  |
| 9  | 16 | 9  | 83997951  | 1086     | 83999037  | 1088     | +    | 15060 | 16148 | 90   | non-repetitive                               | Charlie10_DNA/HAT-Charlie   | 203                    | MIRc9_SINE/MIR              | 105                  | ENSSSCG0 | 11629    | N06    | 5        | 20       | 0.25     | 7.5      |          |          |          |  |  |
| N  | R  | 30 | 101131837 | 457      | 101132294 | 472      | +    | 242   | 714   | 69   | non-repetitive                               | LTR73_LTR/ERV1              | 522                    | SINE1D_SS_SINE/RNA          | 339                  | ENSSSCG0 | 46868    |        |          |          |          |          |          |          |          |  |  |
| N  | R  | 30 | 101132858 | 1024     | 101132882 | 1059     | +    | 1150  | 2209  | 100  | SINE1_SS_SINE/RNA                            | SINE1D_SS_SINE/RNA          | 100                    | SINE1_SS_SINE/RNA           | 1                    | ENSSSCG0 | 49456    |        |          |          | 15       | 0.533333 | 6,666667 |          |          |  |  |
| N  | R  | 30 | 101134787 | 119      | 101134906 | 119      | -    | 5197  | 5315  | 67   | Pre0_SS_SINE/RNA                             | Pre0_SS_SINE/RNA            | 93                     | Pre0_SS_SINE/RNA            | 409                  | ENSSSCG0 | 49480    | N02    | 0        | 4        | 0        | 10       |          |          |          |  |  |
| N  | R  | 30 | 101135585 | 779      | 101136364 | 773      | +    | 6368  | 7141  | 64   | Pre0_SS_SINE/RNA                             | Pre0_SS_SINE/RNA            | 5                      | Pre0_SS_SINE/RNA            | 5                    | ENSSSCG0 | 50938    |        |          |          | 22       | 0.227273 | 7,727273 |          |          |  |  |
| N  | R  | 30 | 101137665 | 870      | 101137485 | 895      | +    | 7130  | 8025  | 68   | SINE1C_SS_SINE/RNA                           | SINE1C_SS_SINE/RNA          | 2                      | SINE1C_SS_SINE/RNA          | 15                   | ENSSSCG0 | 52059    | COX1   | 4        | 12       | 0.333333 | 6,666667 |          |          |          |  |  |
| N  | R  | 30 | 101138222 | 166      | 101138388 | 169      | +    | 8387  | 8556  | 69   | L1MB3_LINE/L1                                | L1MB3_LINE/L1               | 1                      | L1MB3_LINE/L1               | 10                   | ENSSSCG0 | 52962    | COX2   | 1        | 3        | 0.333333 | 6,666667 |          |          |          |  |  |
| N  | R  | 30 | 130323131 | 648      | 130323179 | 648      | +    | 8433  | 9481  | 64   | Interupting_L1B_SS_LINE/L1                   | Interupting_L1B_SS_LINE/L1  | 6                      | L1B_SS_LINE/L1              | 6                    | ENSSSCG0 | 14004    | COX2   | 6        | 13       | 0.461538 | 5,384615 |          |          |          |  |  |
| 9  | 24 | 9  | 130438962 | 648      | 130437610 | 648      | +    | 8433  | 9081  | 94   | Interupting_L1B_SS_LINE/L1                   | Interupting_L1B_SS_LINE/L1  | 6                      | L1B_SS_LINE/L1              | 6                    | ENSSSCG0 | 15333    | COX2   | 6        | 13       | 0.461538 | 5,384615 |          |          |          |  |  |
| 9  | 25 | 9  | 136195867 | 165      | 136196032 | 165      | -    | 5386  | 5550  | 87   | Interrupting_L1M5_LINE/L1                    | L1M5z2_LINE/L1              | 1                      | (TTG)n_Simple_repeat        | 92                   | ENSSSCG0 | 14206    | N02    | 0        | 1        | 0        | 10       |          |          |          |  |  |
| 10 | 01 | 10 | 17791418  | 256      | 17791614  | 263      | +    | 364   | 627   | 71   | A-rich_low_complexity                        | A-rich_low_complexity       | 43                     | Pre0_SS_SINE/RNA            | 552                  | ENSSSCG0 |          |        |          |          |          |          |          |          |          |  |  |
| 10 | 02 | 10 | 35756982  | 76       | 35766058  | 74       | -    | 6368  | 6441  | 96   | Interrupting_PRE1_SINE/RNA                   | PRE1_SINE/RNA               | 1                      | PRE1_SINE/RNA               | 2                    | ENSSSCG0 |          |        |          |          | 1        | 9        | 0.111111 | 8,888889 |          |  |  |
| 10 | 03 | 10 | 39203317  | 513      | 39203830  | 526      | +    | 7558  | 8093  | 60   | MER81_mir_LTR/ERV1                           | MER81_mir_LTR/ERV1          | 57                     | Pre0_SS_SINE/RNA            | 500                  | ENSSSCG0 | 254610   | COX1   | 0        | 7        | 0        | 5        | 10       |          |          |  |  |
| 10 | 04 | 10 | 54201251  | 66       | 54201317  | 66       | +    | 9711  | 9777  | 83   | L1-3_Ssc_LINE/L1                             | A-rich_low_complexity       | 0                      | L1-3_Ssc_LINE/L1            | 49                   | ENSSSCG0 |          | ATP6   |          |          |          |          |          |          |          |  |  |
| 10 | 05 | 10 | 60417416  | 65       | 60417481  | 65       | -    | 10036 | 10100 | 86   | Interrupting_Pred0_SS_SINE/RNA               | PRE1b_SINE/RNA              | 0                      | PRE1b_SINE/RNA              | 2                    | ENSSSCG0 | 109847   | COX3   | 0        | 0        | 0        | 0        |          |          |          |  |  |
| N  | R  | 31 | 10740564  | 941      | 107405505 | 965      | -    | 6064  | 7028  | 69   | PRE1g_SINE/RNA                               | LTR39A2_Ssc_LTR/ERV1        | 61                     | PRE1g_SINE/RNA              | 4                    | ENSSSCG0 | 39170    | N02    | 5        | 25       | 0.2      | 8        |          |          |          |  |  |
| N  | R  | 31 | 10741016  | 1567     | 107411731 | 1613     | +    | 3530  | 5142  | 66   | Pre0_SS_SINE/RNA                             | Pre0_SS_SINE/RNA            | 6                      | Pre0_SS_SINE/RNA            | 5                    | ENSSSCG0 | 45396    |        |          |          | 25       | 0.28     | 7.2      |          |          |  |  |
| N  | R  | 31 | 107413207 | 333      | 107413200 | 338      | -    | 3000  | 3337  | 75   | L1-2_Ssc_LINE/L1                             | LTR0A2_Ssc_LTR/ERV1         | 5                      | (TAGAT)n_Simple_repeat      | 10                   | ENSSSCG0 | 46985    |        |          |          |          |          |          |          |          |  |  |
| N  | R  | 31 | 10742849  | 425      | 107428924 | 457      | +    | 8313  | 8769  | 65   | non-repetitive                               | unique upstream             | -                      | PRE1j_SINE/RNA              | 832                  | ENSSSCG0 | 62580    | COX2   | 4        | 10       | 0.4      | 6        |          |          |          |  |  |
| N  | R  | 31 | 107431671 | 224      | 107431895 | 247      | +    | 8518  | 8764  | 67   | L1-2_Ssc_LINE/L1                             | L1MB3_LINE/L1               | 221                    | L1-2_Ssc_LINE/L1            | 4                    | ENSSSCG0 | 65560    | COX2   | 2        | 7        | 0.287514 | 7,142857 |          |          |          |  |  |
| N  | R  | 31 | 107433281 | 241      | 107433222 | 243      | -    | 8024  | 8266  | 69   | SINE1A_SS_SINE/RNA                           | SINE1A_SS_SINE/RNA          | 7                      | SINE1A_SS_SINE/RNA          | 2                    | ENSSSCG0 | 67187    | COX1   | 1        | 4        | 0.25     | 7.5      |          |          |          |  |  |
| N  | R  | 31 | 107433706 | 1525     | 107435231 | 1562     | +    | 6422  | 7983  | 66   | PRE1c_SINE/RNA                               | SINE1C_SS_SINE/RNA          | 62                     | PRE1c_SINE/RNA              | 1                    | ENSSSCG0 | 68896    |        |          |          | 7        | 24       | 0.291667 | 7,083333 |          |  |  |
| N  | R  | 31 | 107435474 | 165      | 107435639 | 162      | +    | 6273  | 6434  | 76   | Pre0_SS_SINE/RNA                             | Pre0_SS_SINE/RNA            | 4                      | Pre0_SS_SINE/RNA            | 1                    | ENSSSCG0 | 69304    |        |          |          | 14       | 0.071429 | 9,285714 |          |          |  |  |
| N  | R  | 31 | 107435981 | 189      | 107436170 | 193      | +    | 5982  | 6174  | 64   | L1B_SS_LINE/L1                               | L1B_SS_LINE/L1              | 36                     | L1B_SS_LINE/L1              | 1                    | ENSSSCG0 | 69835    | N02    | 0        | 0        | 0        | 10       |          |          |          |  |  |
| N  | R  | 31 | 107437470 | 1213     | 107438683 | 1253     | +    | 3515  | 4767  | 67   | non-repetitive                               | unique upstream             | -                      | (TC)n_Simple_repeat         | 985                  | ENSSSCG0 | 72348    |        |          |          | 4        | 20       | 0.2      | 8        |          |  |  |
| N  | R  | 31 | 107438685 | 965      | 107439650 | 1008     | +    | 2413  | 3420  | 69   | Pre0_SS_SINE/RNA                             | RNA-Leu-TTA(m):RNA          | 301                    | (TC)n_Simple_repeat         | 18                   | ENSSSCG0 | 73315    |        |          |          | 1        | 7        | 0.142857 | 8,571429 |          |  |  |
| N  | R  | 31 | 107440534 | 906      | 107441440 | 936      | +    | 1147  | 2082  | 67   | (TTATTAG)n_Simple_repeat                     | Pre0_SS_SINE/RNA            | 55                     | (TTATTAG)n_Simple_repeat    | 50                   | ENSSSCG0 | 75105    |        |          |          | 3        | 12       | 0.25     | 7.5      |          |  |  |
| 11 | 01 | 11 | 1552676   | 172      | 1552676   | 172      | -    | 9632  | 9803  | 81   | Interrupting_SINE1D_SS_SINE/RNA              | SINE1D_SS_SINE/RNA          | 18                     | ENSSSCG0                    | 15750                | ATP6     | 1        | 6      | 0.166667 | 6,333333 |          |          |          |          |          |  |  |
| 11 | 02 | 11 | 16941035  | 181      | 16941226  | 183      | +    | 7276  | 7641  | 77   | L1M4E1_LINE/L1                               | L1M4E1_LINE/L1              | 17                     | L1M4E1_LINE/L1              | 1                    | ENSSSCG0 | 77177    | COX1   | 1        | 2        | 0.5      | 1.5      |          |          |          |  |  |
| 11 | 03 | 11 | 30715413  | 424      | 30715837  | 431      | +    | 6210  | 6641  | 73   | (ATAGATG)n_Simple_repeat                     | LTR40A_LTR/ERV1             | 827                    | (ATAGATG)n_Simple_repeat    | 83                   | ENSSSCG0 | 359150   |        |          |          | 2        | 13       | 0.153846 | 8,461538 |          |  |  |
| 11 | 04 | 11 | 31567478  | 201      | 31567679  | 201      | +    | 15434 | 15635 | 82   | non-repetitive                               | PRE1h_SINE/RNA              | 141                    | MER3A4_LTR/ERV1             | 770                  | ENSSSCG0 | 433337   | CYTB   | 0        | 5        | 0        | 10       |          |          |          |  |  |
| 11 | 05 | 11 | 35496075  | 187      | 35496262  | 190      | +    | 9694  | 9884  | 69   | L2_LINE/L2                                   | Pre0_SS_SINE/RNA            | 431                    | L2_LINE/L2                  | 51                   | ENSSSCG0 | 324990   | ATP6   | 1        | 4        | 0.25     | 7.5      |          |          |          |  |  |
| 11 | 06 | 11 | 35970845  | 129      | 35970974  | 131      | +    | 606   | 737   | 76   | L1-3_Ssc_LINE/L1                             | L1-3_Ssc_LINE/L1            | 39                     | Arthur1_DNA/HAT-Tip100      | 265                  | ENSSSCG0 | 205083   |        |          |          |          |          |          |          |          |  |  |
| 11 | 07 | 11 | 39554110  | 240      | 39554350  | 240      | +    | 7739  | 7979  | 87   | Pre0_SS_SINE/RNA                             | Pre0_SS_SINE/RNA            | 0                      | L1B_SS_LINE/L1              | 528                  | ENSSSCG0 | 729017   | COX1   | 0        | 1        | 0        | 10       |          |          |          |  |  |
| 11 | 08 | 11 | 39681163  | 240      | 39681403  | 240      | -    | 7740  | 7979  | 87   | Pre0_SS_SINE/RNA                             | L1B_SS_LINE/L1              | 529                    | Pre0_SS_SINE/RNA            | 1                    | ENSSSCG0 | 92670    | COX1   | 0        | 1        | 0        | 10       |          |          |          |  |  |
| 11 | 09 | 11 | 47357806  | 148      | 47357954  | 149      | +    | 8813  | 8962  | 89   | Interrupting_Pred0_SS_SINE/RNA               | PRE1a_SINE/RNA              | 0                      | PRE1b_SINE/RNA              | 6                    | ENSSSCG0 | 328232   | COX2   | 0        | 1        | 0        | 10       |          |          |          |  |  |
| 11 | 10 | 11 | 47926468  | 145      | 47926613  | 145      | +    | 10917 | 11062 | 92   | HALL_SS_LINE/L1                              | HALL_SS_LINE/L1             | 92                     | HALL_SS_LINE/L1             | 1                    | ENSSSCG0 | 238669   | N03    | 0        | 0        | 0        | 0        |          |          |          |  |  |
| 11 | 11 | 11 | 87074432  | 142      | 87074574  | 147      | +    | 3515  | 3661  | 74   | G-rich_low_complexity                        | G-rich_low_complexity       | 100                    | G-rich_low_complexity       | 197                  | ENSSSCG0 |          |        |          |          |          |          |          |          |          |  |  |
| N  | R  | 32 | 12        | 774664   | 1774961   | 1774961  | 302  | +     | 409   | 711  | 69                                           | CHR-1_SINE/RNA              | CHR-1_SINE/RNA         | 4                           | CHR-1_SINE/RNA       | 535      | ENSSSCG0 | 127908 |          |          |          |          |          |          |          |  |  |
| N  | R  | 32 | 12        | 776216   | 100       | 776216   | 302  | +     | 3565  | 4075 | 65                                           | non-repetitive              | (TAATA)n_Simple_repeat | 125                         | unique downstream    | -        | ENSSSCG0 | 126356 |          |          |          | 5        | 0        | 5        | 10       |  |  |
| N  | R  | 32 | 12        | 778980   | 183       | 779163   | 183  | +     | 5992  | 6175 | 69                                           | non-repetitive              | Pre0_SS_SINE/RNA       | 107                         | unique downstream    | -        | ENSSSCG0 | 123592 | N02      | 0        | 5        | 0        | 10       |          |          |  |  |
| N  | R  | 32 | 12        | 779246   | 1595      | 780841   | 1635 | +     | 6337  | 7972 | 68                                           | SINE1B_SS_SINE/RNA          | SINE1B_SS_SINE/RNA     | 373                         | SINE1B_SS_SINE/RNA   | 62       | ENSSSCG0 | 123326 |          |          |          | 9        | 34       | 0.264706 | 7,352941 |  |  |
| N  | R  | 32 | 12        | 791260   | 253       | 791513   | 291  | +     | 8415  | 8706 | 64                                           | PRE1j_SINE/RNA              | PRE1j_SINE/RNA         | 28                          | unique downstream    | -        | ENSSSCG0 | 113132 | COX2     | 0        | 8        | 0.125    | 8.75     |          |          |  |  |
| N  | R  | 33 | 12        | 29974890 | 196       | 29975086 | 199  | +     | 9142  | 9341 | 73                                           | Interrupting_L1B_SS_LINE/L1 | L1B_SS_LINE/L1         | 31                          | L1B_SS_LINE/L1       | 4        | ENSSSCG0 | 701649 | ATP6     | 2        | 3        | 0.666667 | 3,333333 |          |          |  |  |
| N  | R  | 33 | 12        | 29975251 | 233       | 29975484 | 239  | +     | 9336  | 9575 | 66                                           | Interrupting_L1B_SS_LINE/L1 | L1B_SS_LINE/L1         | 0                           | unique downstream    | -        | ENSSSCG0 | 701288 | ATP6     | 0        | 3        | 0        | 10       |          |          |  |  |
| 12 | 08 | 12 | 53654776  | 165      | 53654941  | 171      | +    | 10399 | 10570 | 71   | non-repetitive                               | MIRb_SINE/MIR               | 166                    | MER9A8_DNA/HAT-Backpack     | 371                  | ENSSSCG0 | 6301     | COX3   | 1        | 1        | 1        | 0        |          |          |          |  |  |
| 12 | 09 | 12 | 58876444  | 118      | 58876562  | 118      | +    | 13057 | 13175 | 85   | non-repetitive                               | LTR33_LTR/ERV1              | 144                    | MIR3_SINE/MIR               | 193                  | ENSSSCG0 | 174077   | N03    | 1        | 1        | 0        | 10       |          |          |          |  |  |
| 12 | 10 | 12 | 6112631   | 68       | 61126599  | 68       | +    | 5706  | 5774  | 81   | non-repetitive                               | MIR1_Ann_SINE/MIR           | 150                    | (CAAAA)n_Simple_repeat      | 347                  | ENSSSCG0 | 0        | N02    | 1        | 2        | 0.5      | 5        |          |          |          |  |  |
| 12 | 11 | 12 | 61378172  | 68       | 61378248  | 68       | +    | 5706  | 5774  | 81   | non-repetitive                               | (CAAAA)n_Simple_repeat      | 347                    | (CAAAA)n_Simple_repeat      | 347                  | ENSSSCG0 | 133881   | N02    | 1        | 2        | 0.5      | 5        |          |          |          |  |  |
| 13 | 01 | 13 | 3918282   | 164      | 3918464   | 164      | +    | 9207  | 9371  | 84   | Interrupting_L1M4E1_LINE/L1                  | L1-2_Ssc_LINE/L1            | 29                     | Interrupting_L1M4E1_LINE/L1 | 2                    | ENSSSCG0 | 118423   | ATP6   | 1        | 3        | 0.333333 | 6,666667 |          |          |          |  |  |
| N  | R  | 34 | 13        | 7558055  | 443       | 7558498  | 450  | +     | 8940  | 9390 | 71                                           | L1-3_Ssc_LINE/L1            | L1-3_Ssc_LINE/L1       | 13                          | Pre0_SS_SINE/RNA     | 375      | ENSSSCG0 | 68652  |          |          |          | 1        | 7        | 0.142857 | 8,571429 |  |  |
| N  | R  | 34 | 13        | 7559099  | 182       | 7559281  | 183  | +     | 9633  | 9816 | 61                                           | Pre0_SS_SINE/RNA            | PRE1f_SINE/RNA         | 1                           | Pre0_SS_SINE/RNA     | 112      | ENSSSCG0 | 69435  | ATP6     | 1        | 6        | 0.166667 | 6,333333 |          |          |  |  |
| N  | R  | 35 | 13        | 20248651 | 115       | 20248766 | 116  | -     | 6214  | 6329 | 86                                           | PRE1i_SINE/RNA              | HALL1_SS_LINE/L1       | 15                          | PRE1i_SINE/RNA       | 1        | ENSSSCG0 | 12581  |          |          |          | 0        | 1        | 0        | 10       |  |  |
| N  | R  | 35 | 13        | 20248992 | 726       | 20249178 | 755  | +     | 5470  | 6224 | 65                                           | Pre0_SS_SINE/RNA            | Pre0_SS_SINE/RNA       | 17                          | Pre0_SS_SINE/RNA     | 12       | ENSSSCG0 | 12240  | N02      | 3        | 17       | 0.176471 | 8,235294 |          |          |  |  |
| N  | R  | 35 | 13        | 2024993  | 609       | 2025602  | 614  | +     | 4852  | 5465 | 71                                           | Pre0_SS_SINE/RNA            | Pre0_SS_SINE/RNA       | 2                           | Pre0_SS_SINE/RNA     | 10       | ENSSSCG0 | 11239  | N01      | 1        | 8        | 0.125    | 8.75     |          |          |  |  |
| N  | R  | 35 | 13        | 20250870 | 187       | 20251057 | 187  | -     | 4681  | 4867 | 77                                           | Pre0_SS_SINE/RNA            | Pre0_SS_SINE/RNA       | 0                           | Pre0_SS_SINE/RNA     | 102      | ENSSSCG0 | 10362  | N01      | 1        | 4        | 0.25     | 7.5      |          |          |  |  |
| N  | R  | 35 | 13        | 20253721 | 252       | 20253973 | 255  | -     | 3471  | 3725 | 80                                           | HALL_SS_LINE/L1             | L1-2_Ssc_LINE/L1       | 45                          | ERV1n-2_Ssc_LTR/ERV1 | 138      | ENSSSCG0 | 7511   |          |          |          | 0        | 0        | 0        | 10       |  |  |
| N  | R  |    |           |          |           |          |      |       |       |      |                                              |                             |                        |                             |                      |          |          |        |          |          |          |          |          |          |          |  |  |

|        |       |    |           |      |           |      |         |       |    |                                 |                       |     |                      |     |          |        |      |    |    |          |          |                |                      |                            |     |
|--------|-------|----|-----------|------|-----------|------|---------|-------|----|---------------------------------|-----------------------|-----|----------------------|-----|----------|--------|------|----|----|----------|----------|----------------|----------------------|----------------------------|-----|
| N_R_40 | 14_17 | 14 | 36165684  | 3809 | 36169493  | 3886 | + 12618 | 16504 | 68 | LI-3_Ssc_LINE/L1                | Pre0_SS_SINE/RNA      | 630 | U6:nRNA              | 10  | ENSSSCG0 | 855    | ND4  | 35 | 83 | 0,421687 | 5,783133 | MT-14634-15585 | 17:58917083-58918020 | CyB                        |     |
| N_R_40 | 14_18 | 14 | 36170228  | 346  | 36170574  | 347  | + 216   | 563   | 77 | LI-3_Ssc_LINE/L1                | LI-3_Ssc_LINE/L1      | 382 | LI-3_Ssc_LINE/L1     | 61  | ENSSSCG0 | 730    |      |    |    |          |          | MT-15597-15793 | 17:58918358-58918551 | ENSBTAG0000043572          |     |
| N_R_40 | 14_19 | 14 | 36171859  | 504  | 36172363  | 500  | + 1238  | 1738  | 73 | PRE1r_SINE/RNA                  | LI-3_Ssc_LINE/L1      | 10  | PRE1r_SINE/RNA       | 10  | ENSSSCG0 | 261    |      | 0  | 3  | 0        | 10       | MT-15597-15793 | 17:58918358-58918551 | ENSBTAG0000043572          |     |
| N_R_40 | 14_20 | 14 | 36172557  | 125  | 36172582  | 127  | + 2514  | 2241  | 81 | Pre0_SS_SINE/RNA                | PRE1r_SINE/RNA        | 1   | Pre0_SS_SINE/RNA     | 1   | ENSSSCG0 | 354    | ND4  | 0  | 1  | 1        | 0        | MT-16155-16336 | 17:58919259-58919445 | ---                        |     |
| N_R_40 | 14_21 | 14 | 36172984  | 715  | 36173699  | 766  | + 2636  | 3402  | 67 | Pre0_SS_SINE/RNA                | Pre0_SS_SINE/RNA      | 18  | Pre0_SS_SINE/RNA     | 1   | ENSSSCG0 | 3486   |      | 0  | 6  | 0        | 10       | MT-16155-16336 | 17:58919259-58919445 | ---                        |     |
| N_R_40 | 14_22 | 14 | 36173955  | 1477 | 36175432  | 1506 | + 3363  | 4869  | 71 | Interrupting_Pre0_SS_SINE/RNA   | Pre0_SS_SINE/RNA      | 3   | Pre0_SS_SINE/RNA     | 9   | ENSSSCG0 | 4457   |      | 4  | 23 | 0        | 10       | MT-13913       | 8,26087              | MT-3787-4099               | ND1 |
| N_R_40 | 14_23 | 14 | 36175900  | 377  | 36176277  | 372  | + 4864  | 5236  | 73 | LIB_Ssc_LINE/L1                 | Pre0_SS_SINE/RNA      | 203 | LIB_Ssc_LINE/L1      | 2   | ENSSSCG0 | 6420   | ND1  | 2  | 5  | 0,4      | 6        | MT-4120-4288   | 17:58920453-58920699 | ENSBTAG0000043565          |     |
| N_R_41 | 14_24 | 14 | 43109648  | 117  | 43109765  | 117  | + 11992 | 12109 | 78 | Pre0_SS_SINE/RNA                | LTR10_SS_LTR/ERV1     | 816 | Pre0_SS_SINE/RNA     | 13  | ENSSSCG0 | 927    | ND4  | 0  | 0  | 0        | 10       |                |                      |                            |     |
| N_R_41 | 14_25 | 14 | 43110041  | 264  | 43110209  | 263  | + 1710  | 17273 | 83 | Pre0_SS_SINE/RNA                | Pre0_SS_SINE/RNA      | 6   | MIRb_SINE/MIR        | 26  | ENSSSCG0 | 314    | ND4  | 0  | 3  | 0        | 10       |                |                      |                            |     |
|        | 14_26 | 14 | 58859077  | 257  | 58851234  | 257  | + 2203  | 2459  | 90 | non-repetitive                  | unique upstream       | -   | L1ME3G_LINE/L1       | 462 | ENSSSCG0 |        |      | 3  | 3  | 1        | 0        |                |                      |                            |     |
|        | 14_27 | 14 | 59121635  | 47   | 59121682  | 47   | + 16541 | 16588 | 94 | non-repetitive                  | unique downstream     | -   | unique downstream    | -   | ENSSSCG0 | 4052   |      | 0  | 0  | 0        | 10       |                |                      |                            |     |
|        | 14_28 | 14 | 61641393  | 338  | 61641731  | 362  | + 5830  | 6191  | 72 | Interrupting_LI-2_Ssc_LINE/L1   | LI-2_Ssc_LINE/L1      | 10  | HALL1_SS_LINE/L1     | 14  | ENSSSCG0 | ND2    | 2    | 9  | 0  | 222222   | 7,777778 |                |                      |                            |     |
| N_R_42 | 14_29 | 14 | 65695395  | 152  | 65695547  | 156  | + 407   | 563   | 78 | Pre0_SS_SINE/RNA                | SINE1B_SS_SINE/RNA    | 2   | Pre0_SS_SINE/RNA     | 2   | ENSSSCG0 | 11589  |      |    |    |          |          |                |                      |                            |     |
| N_R_42 | 14_30 | 14 | 65696914  | 675  | 65697589  | 666  | + 1435  | 691   | 69 | Pre0_SS_SINE/RNA                | Pre0_SS_SINE/RNA      | 18  | Pre0_SS_SINE/RNA     | 18  | ENSSSCG0 | 13472  |      | 6  | 10 | 0,6      | 4        |                |                      |                            |     |
| N_R_42 | 14_31 | 14 | 65698853  | 332  | 65699185  | 335  | + 3650  | 3985  | 69 | Pre0_SS_SINE/RNA                | Pre0_SS_SINE/RNA      | 57  | HALL1_SS_LINE/L1     | 40  | ENSSSCG0 | 15227  |      | 0  | 3  | 0        | 10       |                |                      |                            |     |
| N_R_43 | 14_32 | 14 | 65721678  | 1762 | 65723440  | 1757 | + 6274  | 8031  | 69 | SINE1B_SS_SINE/RNA              | A-rich/Low complexity | 185 | SINE1B_SS_SINE/RNA   | 8   | ENSSSCG0 | 13007  |      | 7  | 35 | 0,2      | 8        |                |                      |                            |     |
| N_R_43 | 14_33 | 14 | 65723547  | 165  | 65723712  | 167  | + 8020  | 8187  | 71 | Interrupting_SINE1_SS_SINE/RNA  | SINE1_SS_SINE/RNA     | 0   | SINE1A_SS_SINE/RNA   | 59  | ENSSSCG0 | 11138  | COX1 | 0  | 2  | 0        | 10       |                |                      |                            |     |
|        | 14_34 | 14 | 76577892  | 76   | 76577968  | 76   | + 5221  | 5296  | 89 | MIR_SINE/MIR                    | MIR_SINE/MIR          | 71  | MIRb_SINE/MIR        | 863 | ENSSSCG0 | 64429  | ND2  | 0  | 2  | 0        | 10       |                |                      |                            |     |
|        | 14_35 | 14 | 83725026  | 102  | 83725128  | 108  | + 14835 | 14942 | 82 | non-repetitive                  | MIR_SINE/MIR          | 125 | L2_LINE/L2           | 492 | ENSSSCG0 | 2350   | ND6  | 2  | 2  | 1        | 0        |                |                      |                            |     |
|        | 14_36 | 14 | 91005533  | 180  | 91005533  | 183  | + 8226  | 8409  | 85 | Interrupting_LI-2_Ssc_LINE/L1   | HALL1_SS_LINE/L1      | 4   | LI-2_Ssc_LINE/L1     | 1   | ENSSSCG0 | 6827   | COX2 | 1  | 2  | 0,5      | 5        |                |                      |                            |     |
| N_R_44 | 14_37 | 14 | 95627136  | 203  | 95627339  | 218  | + 16370 | 16588 | 69 | LTR73_LTR/ERV1                  | LTR73_LTR/ERV1        | 0   | PRE1r_SINE/RNA       | 471 | ENSSSCG0 | 29891  | CYTB | 1  | 4  | 0,25     | 7,5      | MT-16159-16338 | 28:42165062-42165245 | ---                        |     |
| N_R_44 | 14_38 | 14 | 95628030  | 197  | 95628227  | 217  | + 415   | 632   | 76 | [TAC]n_Simple_repeat            | PRE1r_SINE/RNA        | 21  | [TAC]n_Simple_repeat | 72  | ENSSSCG0 | 30779  |      |    |    |          |          | MT-418-697     | 28:42163485-42164763 | ENSBTAG0000043567          |     |
| N_R_44 | 14_39 | 14 | 95630253  | 531  | 95630784  | 557  | + 1618  | 2175  | 71 | A-rich/Low complexity           | A-rich/Low complexity | 19  | Pre0_SS_SINE/RNA     | 329 | ENSSSCG0 | 33336  |      | 1  | 3  | 0,333333 | 6,666667 | MT-2845-3621   | 28:42175025-42176787 | ND1                        |     |
| N_R_44 | 14_40 | 14 | 95630864  | 242  | 95631106  | 260  | + 2292  | 2352  | 71 | PRE1r_SINE/RNA                  | A-rich/Low complexity | 630 | Pre0_SS_SINE/RNA     | 7   | ENSSSCG0 | 33558  |      | 1  | 3  | 0,333333 | 6,666667 | MT-2845-3621   | 28:42175025-42176787 | ND1                        |     |
| N_R_44 | 14_41 | 14 | 95632212  | 275  | 95632487  | 281  | + 3025  | 3252  | 74 | SINE1_SS_SINE/RNA               | LI-3_Ssc_LINE/L1      | 140 | [A]n_Simple_repeat   | 12  | ENSSSCG0 | 35030  |      |    |    |          |          | MT-2845-3621   | 28:42175525-42176287 | ND1                        |     |
| N_R_44 | 14_42 | 14 | 95632862  | 272  | 95632954  | 281  | + 3378  | 3659  | 77 | SINE1_SS_SINE/RNA               | SINE1_SS_SINE/RNA     | 29  | HRNA-UEA-1(TA)n/HRNA | 119 | ENSSSCG0 | 35506  |      | 0  | 1  | 0        | 10       | MT-3668-4342   | 28:42174107-42175763 | ND1                        |     |
| N_R_44 | 14_43 | 14 | 95632954  | 720  | 95633674  | 750  | + 3703  | 4453  | 67 | Pre0_SS_SINE/RNA                | SINE1_SS_SINE/RNA     | 301 | Pre0_SS_SINE/RNA     | 75  | ENSSSCG0 | 36226  |      | 4  | 16 | 0,25     | 7,5      | MT-3668-4342   | 28:42174107-42175763 | ND1                        |     |
| N_R_44 | 14_44 | 14 | 95635336  | 1335 | 95636671  | 1372 | + 5316  | 6688  | 69 | CHR-1_SINE/RNA                  | LI-3_Ssc_LINE/L1      | 6   | CHR-1_SINE/RNA       | 1   | ENSSSCG0 | 39223  | ND2  | 9  | 30 | 0,3      | 7        | MT-4717-6467   | 28:42171759-42174476 | ND1_COX1                   |     |
| N_R_44 | 14_45 | 14 | 95636777  | 500  | 95637277  | 517  | + 6677  | 7194  | 68 | CHR-1_SINE/RNA                  | CHR-1_SINE/RNA        | 4   | CHR-1_SINE/RNA       | 7   | ENSSSCG0 | 39949  | COX1 | 3  | 11 | 0,272727 | 7,272727 | MT-6455-6815   | 28:42171166-42172552 | COX1                       |     |
| N_R_44 | 14_46 | 14 | 95637511  | 1021 | 95637811  | 1078 | + 1487  | 2041  | 88 | PRE1r_SINE/RNA                  | PRE1r_SINE/RNA        | 3   | PRE1r_SINE/RNA       | 13  | ENSSSCG0 | 41084  | COX1 | 3  | 14 | 0,214286 | 7,857143 | MT-7233-7929   | 28:42162764-42164454 | COX1                       |     |
| N_R_44 | 14_47 | 14 | 95639556  | 467  | 95640023  | 483  | + 8259  | 8742  | 70 | PRE1f_SINE/RNA                  | PRE1f_SINE/RNA        | 3   | LTR4Bc_SS_LTR/ERVk   | 732 | ENSSSCG0 | 42575  | COX1 | 1  | 10 | 0,1      | 9        |                |                      |                            |     |
| N_R_45 | 14_48 | 14 | 107340193 | 126  | 107340319 | 126  | + 4167  | 4292  | 88 | non-repetitive                  | MIRb_SINE/MIR         | 365 | MIRb_SINE/MIR        | 329 | ENSSSCG0 | 159412 | ND1  | 2  | 4  | 0,5      | 5        |                |                      |                            |     |
| N_R_45 | 14_49 | 14 | 107340320 | 67   | 107340387 | 67   | + 15492 | 15558 | 87 | non-repetitive                  | MIRb_SINE/MIR         | 492 | MIRb_SINE/MIR        | 261 | ENSSSCG0 | 159285 | CYTB |    |    |          |          |                |                      |                            |     |
|        | 14_50 | 14 | 111395265 | 62   | 111395237 | 62   | + 13995 | 14057 | 92 | interrupting_Pre0_SS_SINE/RNA   | MIR_SINE/MIR          | 449 | PRE1r_SINE/RNA       | 11  | ENSSSCG0 | ND5    | 0    | 1  | 0  | 10       |          |                |                      |                            |     |
|        | 14_51 | 14 | 113345004 | 66   | 113345068 | 64   | + 566   | 629   | 88 | non-repetitive                  | MIRb_SINE/MIR         | 192 | MIRb_SINE/MIR        | 192 | ENSSSCG0 | 192    |      |    |    |          |          |                |                      |                            |     |
|        | 14_52 | 14 | 115682667 | 71   | 115682738 | 71   | + 6665  | 6736  | 82 | non-repetitive                  | Pre0_SS_SINE/RNA      | 581 | L1MC2_LINE/L1        | 747 | ENSSSCG0 |        | COX1 | 2  | 5  | 0,4      | 6        |                |                      |                            |     |
|        | 14_53 | 14 | 116093971 | 118  | 116094089 | 119  | + 9702  | 9820  | 86 | Interrupting_LI-3_Ssc_LINE/L1   | LI-2_Ssc_LINE/L1      | 1   | LI-2_Ssc_LINE/L1     | 4   | ENSSSCG0 | 18823  | ATP6 | 1  | 3  | 0,333333 | 6,666667 |                |                      |                            |     |
| N_R_46 | 14_54 | 14 | 132592143 | 741  | 132592884 | 751  | + 2180  | 2931  | 70 | non-repetitive                  | unique upstream       | -   | LI-2_Ssc_LINE/L1     | 429 | ENSSSCG0 | 82276  |      | 1  | 8  | 0,125    | 8,75     | MT-2198-3874   | 26:32043743-32043904 | ENSBTAG0000043570, ND1     |     |
| N_R_46 | 14_55 | 14 | 132596198 | 1335 | 132597533 | 1343 | + 3041  | 4384  | 71 | Pre0_SS_SINE/RNA                | LI-3_Ssc_LINE/L1      | 10  | Pre0_SS_SINE/RNA     | 2   | ENSSSCG0 | 77627  |      | 3  | 16 | 0,1875   | 8,125    | MT-3877-4342   | 26:32040159-32041608 | ND1, ENSBTAG0000043575, D2 |     |
| N_R_46 | 14_56 | 14 | 132597792 | 325  | 132598117 | 324  | + 4387  | 4731  | 68 | Pre0_SS_SINE/RNA                | LI-3_Ssc_LINE/L1      | 10  | LI-3_Ssc_LINE/L1     | 238 | ENSSSCG0 | 76790  | ND1  | 2  | 4  | 0,5      | 5        | MT-4409-4517   | 26:32040639-32041748 | ND1                        |     |
| N_R_46 | 14_57 | 14 | 132601543 | 931  | 132602474 | 979  | + 6544  | 7522  | 67 | Interrupting_LIB_Ssc_LINE/L1    | LIB_Ssc_LINE/L1       | 0   | Pre0_SS_SINE/RNA     | 16  | ENSSSCG0 | 72686  | COX1 | 6  | 19 | 0,315789 | 6,842105 | MT-6290-7028   | 26:32043565-32045269 | COX1                       |     |
| N_R_46 | 14_58 | 14 | 132602747 | 1251 | 132603998 | 1334 | + 5196  | 6529  | 66 | LI-1_Ssc_LINE/L1                | Pre0_SS_SINE/RNA      | 5   | LI-2_Ssc_LINE/L1     | 97  | ENSSSCG0 | 71652  | ND2  | 9  | 32 | 0,28125  | 7,1875   | MT-5125-6185   | 26:32041519-32043589 | ND2_COX1                   |     |
| N_R_46 | 14_59 | 14 | 132612767 | 861  | 132613628 | 888  | + 7517  | 8405  | 65 | Pre0_SS_SINE/RNA                | LI-3_Ssc_LINE/L1      | 3   | Pre0_SS_SINE/RNA     | 1   | ENSSSCG0 | 61532  | COX1 | 3  | 11 | 0,272727 | 7,272727 | MT-6290-7028   | 26:32043565-32045269 | COX1                       |     |
| N_R_46 | 14_60 | 14 | 132613946 | 376  | 132614322 | 389  | + 8380  | 8769  | 72 | Pre0_SS_SINE/RNA                | Pre0_SS_SINE/RNA      | 72  | L1MB3_LINE/L1        | 592 | ENSSSCG0 | 60636  | COX2 | 2  | 10 | 0,2      | 8        | MT-6290-7028   | 26:32043565-32045269 | COX1                       |     |
|        | 15_01 | 15 | 6053740   | 291  | 6054031   | 294  | + 3379  | 3672  | 89 | non-repetitive                  | unique upstream       | -   | [TAG]n_Simple_repeat | 247 | ENSSSCG0 | #N/D   |      | 0  | 1  | 0        | 10       |                |                      |                            |     |
|        | 15_02 | 15 | 6215315   | 291  | 6215606   | 294  | + 3379  | 3672  | 89 | non-repetitive                  | unique upstream       | -   | [TAG]n_Simple_repeat | 247 | ENSSSCG0 | #N/D   |      | 0  | 1  | 0        | 10       |                |                      |                            |     |
| N_R_47 | 15_03 | 15 | 28621861  | 431  | 28622292  | 454  | + 8316  | 8769  | 66 | non-repetitive                  | PRE1r_SINE/RNA        | 741 | PRE1r_SINE/RNA       | 247 | ENSSSCG0 | 37399  | COX2 | 2  | 10 | 0,2      | 8        | MT-7027-7717   | 2:47307778-4731458   | COX1                       |     |
| N_R_47 | 15_04 | 15 | 28626249  | 83   | 28626332  | 81   | + 8033  | 8116  | 79 | Interrupting_SINE1B_SS_SINE/RNA | SINE1A_SS_SINE/RNA    | 133 | SINE1B_SS_SINE/RNA   | 1   | ENSSSCG0 | 41439  | COX1 | 0  | 0  | 0        | 10       | MT-7027-7717   | 2:47307778-4731458   | COX1                       |     |
| N_R_47 | 15_05 | 15 | 28626152  | 286  | 28626165  | 286  | + 765   | 8061  | 66 | [T]n_Simple_repeat              | PRE1r_SINE/RNA        | 1   | [T]n_Simple_repeat   | 205 | ENSSSCG0 | 43579  |      | 9  | 35 | 0,257143 | 7,428571 | MT-6360-7017   | 2:4729845-4730502    | COX1                       |     |
| N_R_47 | 15_06 | 15 | 28628197  | 190  | 28628387  | 190  | + 5986  | 6175  | 72 | Pre0_SS_SINE/RNA                | unique upstream       | -   | Pre0_SS_SINE/RNA     | 1   | ENSSSCG0 | 43494  | ND2  | 0  | 5  | 0        | 10       | MT-6360-7017   | 2:4729845-4730502    | COX1                       |     |
| N_R_47 | 15_07 | 15 | 28628656  | 776  | 28629432  | 809  | + 5173  | 5981  | 63 | Pre0_SS_SINE/RNA                | PRE1r_SINE/RNA        | 22  | Pre0_SS_SINE/RNA     | 77  | ENSSSCG0 | 44539  | ND2  | 5  | 16 | 0,3125   | 6,875    | MT-6360-7017   | 2:4729845-4730502    | COX1                       |     |
| N_R_47 | 15_08 | 15 | 28630809  | 730  | 28631539  | 762  | + 1169  | 1930  | 67 | Pre0_SS_SINE/RNA                | Pre0_SS_SINE/RNA      | 218 | Pre0_SS_SINE/RNA     | 59  | ENSSSCG0 | 46466  |      | 2  | 4  | 0,5      | 5        | MT-6360-7017   | 2:4729845-4730502    | COX1                       |     |
|        | 15_09 | 15 | 41977915  | 239  | 41978154  | 239  | + 15380 | 15618 | 86 | non-repetitive                  | [AAT]n_Simple_repeat  | 873 | L2_LINE/L2           | 429 | ENSSSCG0 | 365088 | CYTB | 0  |    |          |          |                |                      |                            |     |
